# Supplementary material for: New Adenovirus Groups in Western Palaearctic Bats
Source: PubMed Central journal article supplement (PMC6116233; doi:10.3390/v10080443), 2018-08-20
Supplement: viruses-10-00443-s001.pdf [file viruses-10-00443-s001.pdf]

Table S1: Tentative viruses names, type of sample and localization of *Pipistrellus* group.

| Tentative virus name                    | Type of sample |    | Localization |
|-----------------------------------------|----------------|----|--------------|
|                                         | OPS            | SS |              |
| Bat mastadenovirus P.pygmaeus 2 160725  |                | X  | Sevilla      |
| Bat mastadenovirus P.pygmaeus 11 160725 |                | X  | Sevilla      |
| Bat mastadenovirus P.pygmaeus 14 160725 | X              | X  | Sevilla      |
| Bat mastadenovirus P.pygmaeus 15 160725 | X              | X  | Sevilla      |
| Bat mastadenovirus P.pygmaeus 21 160725 |                | X  | Sevilla      |
| Bat mastadenovirus P.pygmaeus 5 160811  | X              |    | Sevilla      |
| Bat mastadenovirus P.kuhlii 1 160517    | X              |    | Córdoba      |
| Bat mastadenovirus P.kuhlii 3 160517    | X              |    | Córdoba      |
| Bat mastadenovirus P.kuhlii 6 160517    | X              |    | Córdoba      |
| Bat mastadenovirus P.kuhlii 16 160517   | X              |    | Córdoba      |
| Bat mastadenovirus P.kuhlii 17 160517   | X              |    | Córdoba      |
| Bat mastadenovirus P.kuhlii 20 160517   | X              |    | Córdoba      |
| Bat mastadenovirus P.kuhlii 22 160517   | X              |    | Córdoba      |
| Bat mastadenovirus P.kuhlii 40 160517   | X              |    | Córdoba      |
| Bat mastadenovirus P.kuhlii 15 160518   | X              |    | Córdoba      |
| Bat mastadenovirus P.kuhlii 2 160622    | X              |    | Huelva       |
| Bat mastadenovirus P.kuhlii 11 160622   |                | X  | Huelva       |
| Bat mastadenovirus P.pygmaeus 15 160622 | X              | X  | Huelva       |
| Bat mastadenovirus P.kuhlii 18 160622   | X              |    | Huelva       |
| Bat mastadenovirus P.pygmaeus 19 160622 |                | X  | Huelva       |
| Bat mastadenovirus P.pygmaeus 29 160622 | X              |    | Huelva       |
| Bat mastadenovirus P.pygmaeus 31 160622 |                | X  | Huelva       |
| Bat mastadenovirus P.pygmaeus 37 160622 |                | X  | Huelva       |
| Bat mastadenovirus P.pygmaeus 19 160628 |                | X  | Huelva       |
| Bat mastadenovirus P.pygmaeus 20 160628 | X              |    | Huelva       |
| Bat mastadenovirus P.pygmaeus 23 160628 |                | X  | Huelva       |
| Bat mastadenovirus P.pygmaeus 27 160628 | X              |    | Huelva       |
| Bat mastadenovirus P.pygmaeus 6 070616  |                | X  | Lugo         |

Table S2: Tentative viruses names, type of sample and localization of *Nyctalus* group

| Tentative virus name                       | Type of sample |    | Localization |
|--------------------------------------------|----------------|----|--------------|
|                                            | OPS            | SS |              |
| Bat mastadenovirus N. lasiopterus K01076   | x              |    | Cádiz        |
| Bat mastadenovirus N. lasiopterus K01093   | x              |    | Sevilla      |
| Bat mastadenovirus N. lasiopterus K01081   | x              |    | Cádiz        |
| Bat mastadenovirus N. lasiopterus K01089   | x              |    | Cádiz        |
| Bat mastadenovirus N. lasiopterus K00911   |                | x  | La Rioja     |
| Bat mastadenovirus N. lasiopterus K01024   | x              |    | Cádiz        |
| Bat mastadenovirus N. lasiopterus K01502   |                | x  | Málaga       |
| Bat mastadenovirus N. lasiopterus K01504   |                | x  | Málaga       |
| Bat mastadenovirus N. lasiopterus 4 050701 | x              |    | Sevilla      |
| Bat mastadenovirus N. lasiopterus 8 050701 | x              |    | Sevilla      |
| Bat mastadenovirus N. lasiopterus K01317   | x              |    | Sevilla      |
| Bat mastadenovirus N.leisleri 00954        |                | x  | Málaga       |
| Bat mastadenovirus N. lasiopterus K01508   |                | x  | Málaga       |
| Bat mastadenovirus N. lasiopterus K01535   |                | x  | La Rioja     |
| Bat mastadenovirus N. lasiopterus K01550   | x              |    | Málaga       |
| Bat mastadenovirus N.leisleri 00964        |                | x  | La Rioja     |
| Bat mastadenovirus N. lasiopterus K01530   |                | x  | La Rioja     |
| Bat mastadenovirus N.leisleri 3 070704     |                | x  | Gerona       |
| Bat mastadenovirus N.leisleri 1 080616     | x              |    | Navarra      |
| Bat mastadenovirus N. noctula 13341        | x              |    | Navarra      |
| Bat mastadenovirus N. noctula 13481        | x              |    | Navarra      |
| Bat mastadenovirus N. noctula 13483        | x              |    | Navarra      |
| Bat mastadenovirus N. lasiopterus K1849    | x              |    | Cádiz        |

Table S3: Tentative viruses names, type of sample and localization of *Hypsugo* and *Myotis* groups

| Host                 | Tentative virus name                        | Type of sample |    | Localization |
|----------------------|---------------------------------------------|----------------|----|--------------|
|                      |                                             | OPS            | SS |              |
| <b>Hypsugo group</b> | Bat mastadenovirus H. savii 6 070704        |                | X  | Gerona       |
|                      | Bat mastadenovirus H. savii 2 070613        |                | X  | Cáceres      |
|                      | Bat mastadenovirus H. savii 2 070703        |                | X  | Gerona       |
|                      |                                             |                |    |              |
| <b>Myotis group</b>  | Bat mastadenovirus M. emarginatus 5 080703  | X              |    | Vizcaya      |
|                      | Bat mastadenovirus M. emarginatus 8 080703  | X              |    | Vizcaya      |
|                      | Bat mastadenovirus M. emarginatus 15 080703 | X              |    | Vizcaya      |
|                      | Bat mastadenovirus M. bechsteinii 1 080619  | X              |    | Navarra      |
|                      | Bat mastadenovirus M. myotis 6 080623       | X              |    | Córdoba      |

Table S4: Tentative viruses names, type of sample and localization of *Rhinolophus* group.

| Tentative virus name                         | Type of sample |    | Localization |
|----------------------------------------------|----------------|----|--------------|
|                                              | OPS            | SS |              |
| Bat mastadenovirus R.ferrumequinum 1 40622   | X              |    | Valencia     |
| Bat mastadenovirus R.ferrumequinum 1 070704  |                | X  | Gerona       |
| Bat mastadenovirus R.euriale 12 080623       | X              |    | Córdoba      |
| Bat mastadenovirus R.euriale 19 080623       | X              |    | Córdoba      |
| Bat mastadenovirus R.euriale 5 080623        | X              |    | Córdoba      |
| Bat mastadenovirus R.ferrumequinum 19 080623 | X              |    | Córdoba      |
| Bat mastadenovirus R.ferrumequinum 23 080623 | X              |    | Córdoba      |
| Bat mastadenovirus R.ferrumequinum 25 080623 | X              |    | Córdoba      |
| Bat mastadenovirus R.ferrumequinum 5 080623  | X              |    | Córdoba      |
| Bat mastadenovirus R.ferrumequinum 23 080707 | X              |    | Vizcaya      |
| Bat mastadenovirus R.euriale 25 080623       | X              |    | Córdoba      |
| Bat mastadenovirus R.euriale 18 080623       | X              |    | Córdoba      |
| Bat mastadenovirus R.ferrumequinum 30 080623 | X              |    | Córdoba      |
| Bat mastadenovirus R.euriale 2 40409         | X              |    | Valencia     |
| Bat mastadenovirus R.euriale A15             | X              |    | Valencia     |
